# Supplementary material for: PDIA3 gene induces visceral hypersensitivity in rats with irritable bowel syndrome through the dendritic cell-mediated activation of T cells
Source: PeerJ. 2016 Nov 17;4:e2644. doi: 10.7717/peerj.2644 (PMC5119228; doi:10.7717/peerj.2644)
Supplement: Data S3 — Original data for Table 3. [file peerj-04-2644-s003.xls]

## Sheet: Sheet1
		Repeat	1	2	3	4	5
CD4 positive T cell		Control	0.5463	0.5346	0.5431	0.5491	0.5235	0.54±0.01
		Model control	0.6198	0.6032	0.6108	0.5927	0.5877	0.60±0.01
		RNAi control	0.5719	0.5692	0.5589	0.5576	0.5583	0.56±0.01
		PDIA3-RNAi	0.5433	0.5314	0.5119	0.5502	0.5346	0.53±0.01
CD8 positive T cell
		Repeat	1	2	3	4	5
		Control	0.5333	0.5214	0.5019	0.5402	0.5246	0.52±0.01
		PDIA3-RNAi	0.5875	0.5939	0.5886	0.5941	0.5907	0.59±0.00
		Model control	0.5572	0.5529	0.5648	0.5791	0.5491	0.56±0.01
		RNAi control	0.5396	0.5477	0.521	0.5319	0.5402	0.54±0.01
